# The American Journal of Psychiatry

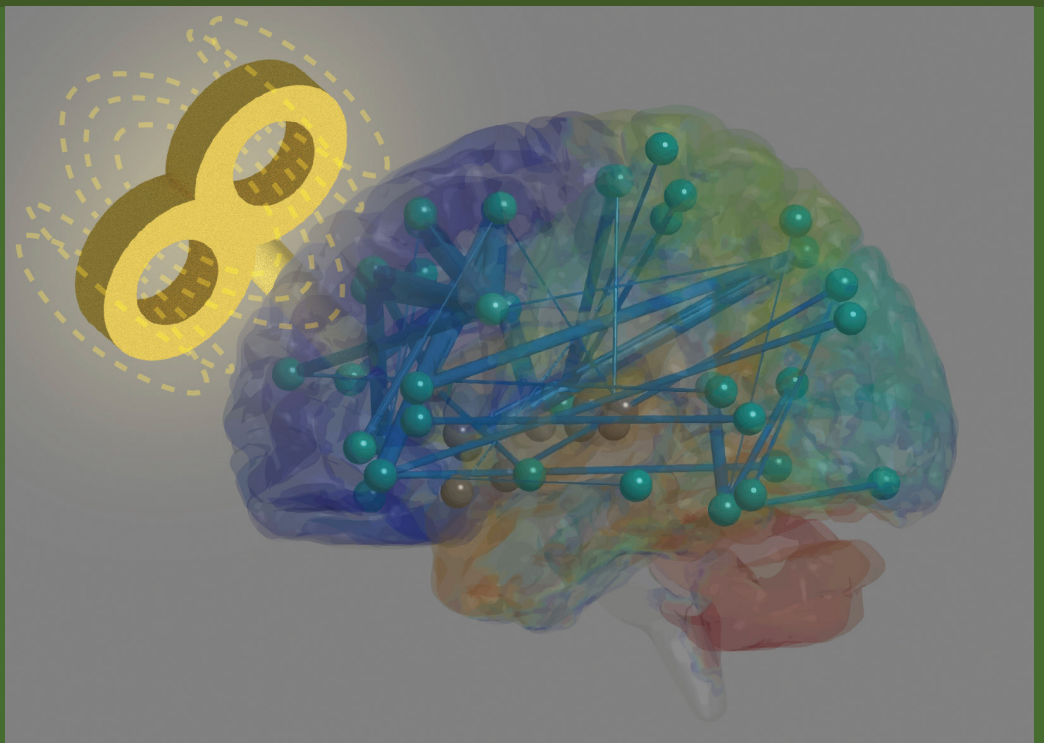

Toward a Better Understanding of the Mechanisms and Pathophysiology of Anhedonia: Are We Ready for Translation?

Longitudinal Trajectory of the Link Between Ventral Striatum and Depression in Adolescence

Digital Intervention for Cognitive Deficits in Major Depression

Predictive Value of Acute Neuroplastic Response to rTMS in Treatment Outcome in Depression
